# Supplementary material for: The structure of winter phytoplankton in Lake Nero, Russia, a hypertrophic lake dominated by Planktothrix-like Cyanobacteria
Source: PubMed Central journal article supplement (PMC3849563; doi:10.1186/2046-9063-9-18), 2013-09-30
Supplement: 2046-9063-9-18-S1.pdf [file 2046-9063-9-18-S1.pdf]

PRIMARY RESEARCH PAPER

Olga Babanazarova, Sergey Sidelev, Svetlana Schischeleva

**The structure of winter phytoplankton in Lake Nero, Russia, a hypertrophic lake dominated by *Planktothrix*-like Cyanobacteria**

Taxonomic composition and eco-geographical characteristics of the under-ice phytoplankton in the lake Nero (1999-2010)

| Taxon                                                       | Habitat | Distribution | Salinity | pH | Saprobity |
|-------------------------------------------------------------|---------|--------------|----------|----|-----------|
| <b>Cyanophyta (Cyanoprokaryota)</b>                         |         |              |          |    |           |
| <b><u>Chroococcales</u></b>                                 |         |              |          |    |           |
| <i>Aphanocapsa delicatissima</i> W. et G.S. West.           | P       | c            | –        | –  | –         |
| <i>A. grevillei</i> (Berk.) Rabenh.                         | L       | c            | –        | Al | o-β       |
| <i>Gloeocapsa</i> sp.                                       | –       | –            | –        | –  | –         |
| <i>Microcystis aeruginosa</i> (Kütz.) Kütz.                 | P       | c            | –        | Al | β         |
| <i>M. flos-aquae</i> (Wittr.) Kirchner                      | P       | c            | IN       | –  | –         |
| <i>Synechocystis</i> sp.                                    | –       | –            | –        | –  | –         |
| <b><u>Nostocales</u></b>                                    |         |              |          |    |           |
| <i>Anabaena cylindrica</i> Lemm.                            | P       | –            | –        | –  | o-β       |
| <i>Anabaena</i> sp.                                         | –       | –            | –        | –  | –         |
| <i>Aphanizomenon gracile</i> Lemm.                          | P       | c            | H        | –  | –         |
| <b><u>Oscillatoriales</u></b>                               |         |              |          |    |           |
| <i>Geitlerinema amphibium</i> (Ag. ex Gom.) Anagn.          | L       | c            | –        | –  | –         |
| <i>Jaaginema geminatum</i> (Menegh. ex Gom.) Anagn. et Kom. | P       | c            | –        | In | –         |
| <i>Limnothrix planctonica</i> (Wolosz.) Meffert             | P       | c            | –        | –  | o-β       |
| <i>L. redekei</i> (Van Goor) Meffert                        | P       | c            | IN       | –  | β         |
| <i>Oscillatoria</i> sp.                                     | –       | –            | –        | –  | –         |
| <i>Phormidium amoenum</i> Kütz. ex Anagn. et Kom.           | O       | –            | IN       | –  | –         |
| <i>P. granulatum</i> (Gardner) Anagn.                       | P       | b            | IN       | –  | –         |
| <i>P. molle</i> Gom.                                        | L       | c            | IN       | –  | β         |

|                                                                         |     |   |    |    |                    |
|-------------------------------------------------------------------------|-----|---|----|----|--------------------|
| <i>Phormidium</i> sp.                                                   | –   | – | –  | –  | –                  |
| <i>Planktolyngbya circumcreta</i> (G.S. West) Anagn. et Kom.            | P   | – | IN | –  | –                  |
| <i>P. contorta</i> (Lemm.) Anagn. et Kom.                               | P   | – | IN | –  | –                  |
| <i>P. limnetica</i> (Lemm.) Kom.-Legn. et Cronb.                        | P   | c | –  | In | $\beta$ - $\alpha$ |
| <i>Planktolyngbya</i> sp.                                               | –   | – | –  | –  | –                  |
| <i>Planktothrix agardhii</i> (Gom.) Anagn. et Kom.                      | P   | c | IN | –  | $\beta$            |
| <i>Pseudanabaena acicularis</i> (Nyg.) Anagn. et Kom.                   | P   | – | IN | –  | –                  |
| <i>P. limnetica</i> (Lemm.) Kom.                                        | P-B | c | IN | –  | $\alpha$ - $\beta$ |
| <i>P. mucicola</i> (Naum. et Hub.-Pestal.) Schwabe                      | P   | c | IN | –  | $\alpha$ - $\beta$ |
| <i>Romeria leopoliensis</i> (Racib.) Koczw.                             | P   | – | –  | –  | $\alpha$ - $\beta$ |
| <b>Chrysophyta</b>                                                      |     |   |    |    |                    |
| <b><u>Chromulinales</u></b>                                             |     |   |    |    |                    |
| <i>Chromulina</i> Cienk. sp.                                            | –   | – | –  | –  | –                  |
| <i>Chrysococcus biporus</i> Skuja                                       | P   | c | IN | In | $\alpha$ - $\beta$ |
| <i>C. punctiformis</i> Pascher                                          | P   | – | IN | In | $\alpha$ - $\beta$ |
| <i>C. triporus</i> Matv.                                                | P   | – | IN | In | $\alpha$ - $\beta$ |
| <i>Kephyrion moniliferum</i> (Schmid.) Bourelly                         | –   | – | –  | –  | –                  |
| <i>K. rubri-claustri</i> Conrad                                         | L   | b | IN | –  | $\alpha$           |
| <i>K. spirale</i> (Lackey) Conrad                                       | L   | – | IN | –  | $\beta$            |
| <i>Kephyrion</i> sp.                                                    | –   | – | –  | –  | –                  |
| <b><u>Ochromonadales</u></b>                                            |     |   |    |    |                    |
| <i>Dinobryon</i> sp.                                                    | –   | – | –  | –  | –                  |
| <i>Mallomonas</i> sp.                                                   | –   | – | –  | –  | –                  |
| <i>Microglena punctifera</i> (Müller) Ehr.                              | L   | c | IN | –  | –                  |
| <i>Ochromonas</i> sp.                                                   | –   | – | –  | –  | –                  |
| <i>Pseudokephyrion conicum</i> (Schiller) Schmid                        | –   | – | –  | –  | –                  |
| <i>Synura</i> sp.                                                       | –   | – | –  | –  | –                  |
| <b>Bacillariophyta</b>                                                  |     |   |    |    |                    |
| <b><u>Thalassiosirales</u></b>                                          |     |   |    |    |                    |
| <i>Cyclostephanos invisitatus</i> (Hohn et Hell.) Ther., Stoer. et Håk. | P   | c | IN | Al | –                  |
| <i>Cyclotella</i> sp.                                                   | –   | – | –  | –  | –                  |
| <i>Stephanodiscus binderanus</i> (Klitz.) Krieg.                        | –   | – | –  | –  | –                  |
| <i>S. hantzschii</i> Grun.                                              | P   | c | IN | Al | $\alpha$ -p        |

|                                                                         |     |   |    |    |                    |
|-------------------------------------------------------------------------|-----|---|----|----|--------------------|
| <i>S. minutulus</i> (Kütz.) Cleve et Möller                             | P   | b | IN | Al | $\alpha$           |
| <i>Stephanodiscus</i> sp.                                               | –   | – | –  | –  | –                  |
| <b><u>Melosirales</u></b>                                               |     |   |    |    |                    |
| <i>Aulacoseira ambigua</i> (Grun.) Sim.                                 | P   | c | IN | Al | $\alpha$ – $\beta$ |
| <i>A. granulata</i> (Ehr.) Sim.                                         | P   | c | IN | Al | $\beta$            |
| <b><u>Araphales</u></b>                                                 |     |   |    |    |                    |
| <i>Fragilaria capucina</i> var. <i>radians</i> (Kütz.) Lange-Bert.      | P   | c | IN | Al | $\alpha$ – $\beta$ |
| <i>Staurosira construens</i> var. <i>construens</i> Ehr.                | L   | c | IN | Al | $\alpha$ – $\beta$ |
| <i>S. construens</i> var. <i>binodis</i> (Ehr.) Ham.                    | O   | c | IN | Al | $\alpha$           |
| <i>S. construens</i> var. <i>exigua</i> (Smith) Kobayasi                | L   | c | IN | Al | –                  |
| <i>Staurosirella berlinensis</i> (Lemm.) Bukht.                         | P   | c | IN | Al | $\beta$            |
| <i>Synedra</i> sp.                                                      | –   | – | –  | –  | –                  |
| <i>Ulnaria acus</i> (Kütz.) Aboal                                       | P   | c | IN | Al | $\alpha$ – $\beta$ |
| <i>U. delicatissima</i> var. <i>angustissima</i> (Smith) Aboal et Silva | P   | c | IN | Al | $\alpha$ – $\beta$ |
| <b><u>Raphales</u></b>                                                  |     |   |    |    |                    |
| <i>Cymatopleura solea</i> (Breb.) Smith                                 | L   | c | IN | Al | $\beta$            |
| <i>Gyrosigma acuminatum</i> (Kütz.) Rabenh.                             | O   | b | IN | Al | $\beta$            |
| <i>Navicula</i> sp.                                                     | –   | – | –  | –  | –                  |
| <i>Nitzschia acicularis</i> (Kütz.) W. Sm.                              | P   | b | IN | Al | $\alpha$           |
| <i>N. gracilis</i> Hantzsh.                                             | P   | c | IN | In | $\beta$            |
| <i>N. holsatica</i> Hust.                                               | P–B | c | IN | In | –                  |
| <i>N. longissima</i> (Bréb.) Ralfs                                      | –   | – | –  | –  | –                  |
| <i>N. palea</i> var. <i>debilis</i> (Kütz.) Grun.                       | P–B | c | H  | In | $\alpha$           |
| <i>N. paleacea</i> Grun.                                                | P–B | c | IN | Al | $\beta$ – $\alpha$ |
| <i>N. recta</i> Hantzsch                                                | L   | c | –  | Al | $\beta$ – $\alpha$ |
| <i>N. sublinearis</i> Hust.                                             | B   | b | IN | –  | $\alpha$ – $\beta$ |
| <i>N. vermicularis</i> (Kütz.) Hantzsch                                 | L   | c | IN | Al | $\beta$            |
| <i>Pinnularia major</i> (Kütz.) Rabenh.                                 | B   | c | IN | In | $\alpha$           |
| <i>P. microstauron</i> (Ehr.) Cleve                                     | B   | c | –  | In | –                  |
| <i>Surirella biseriata</i> Bréb                                         | P   | c | IN | Al | $\beta$            |
| <b><u>Xanthophyta</u></b>                                               |     |   |    |    |                    |
| <b><u>Heterococcales</u></b>                                            |     |   |    |    |                    |
| <i>Tetraedriella impressa</i> Pasch.                                    | P   | – | –  | –  | –                  |

|                                                                         |   |   |    |    |     |
|-------------------------------------------------------------------------|---|---|----|----|-----|
| <b>Cryptophyta</b>                                                      |   |   |    |    |     |
| <b><u>Cryptomonadales</u></b>                                           |   |   |    |    |     |
| <i>Chroomonas minima</i> Czosnow.                                       | – | – | –  | –  | –   |
| <i>C. caudate</i> Geitler                                               | P | c | IN | –  | β–α |
| <i>Cryptomonas caudata</i> Schiller                                     | P | c | IN | –  | –   |
| <i>C. curvata</i> Ehr.                                                  | P | c | –  | In | β   |
| <i>C. erosa</i> Ehr.                                                    | L | c | H  | In | α   |
| <i>C. obovoidea</i> Pascher                                             | P | – | –  | –  | –   |
| <i>C. marssonii</i> Skuja                                               | P | c | IN | –  | o–β |
| <i>C. nasuta</i> Pasch.                                                 | L | – | H  | –  | –   |
| <i>C. ovata</i> Ehr.                                                    | P | c | IN | In | α   |
| <i>C. parapyrenoidifera</i> Skuja                                       | – | – | –  | –  | –   |
| <i>Cryptomonas</i> sp.                                                  | – | – | –  | –  | –   |
| <b>Dinophyta</b>                                                        |   |   |    |    |     |
| <b><u>Peridinales</u></b>                                               |   |   |    |    |     |
| <i>Gymnodinium</i> sp.                                                  | – | – | –  | –  | –   |
| <i>Peridiniopsis sphaeroideum</i> (Christen) Bourrelly                  | P | – | –  | –  | –   |
| <i>Peridinium aciculiferum</i> Lemm.                                    | P | c | –  | In | o–β |
| <i>P. umbonatum</i> var. <i>umbonatum</i> Stein                         | P | c | IN | In | o–β |
| <i>P. umbonatum</i> var. <i>deflandrei</i> (Lefevre) Pop. and Pfiester  | P | – | –  | –  | –   |
| <i>P. umbonatum</i> var. <i>goslaviense</i> (Wolosz.) Pop. and Pfiester | P | – | –  | –  | –   |
| <i>P. umbonatum</i> var. <i>incospicuum</i> Stein.                      | – | – | –  | –  | –   |
| <i>Peridinium</i> sp.                                                   | – | – | –  | –  | –   |
| <i>Woloszynskia tenuissima</i> (Lauterb.) Thomp.                        | – | – | –  | –  | –   |
| <b>Euglenophyta</b>                                                     |   |   |    |    |     |
| <b><u>Euglenales</u></b>                                                |   |   |    |    |     |
| <i>Euglena acus</i> Ehr.                                                | L | c | IN | In | β   |
| <i>E. acus</i> var. <i>minor</i> Hansg.                                 | – | – | –  | –  | –   |
| <i>E. gracilis</i> Klebs                                                | L | c | IN | Al | o–β |
| <i>E. granulata</i> (Klebs) Schmitz                                     | L | c | IN | –  | –   |
| <i>E. hemihromata</i> Skuja                                             | L | – | –  | –  | β   |
| <i>E. limnophila</i> Lemm.                                              | L | – | –  | –  | o–β |
| <i>E. limnophila</i> var. <i>swirenkoi</i> (Arnoldi) Pop.               | L | – | IN | –  | –   |

|                                                               |     |   |    |    |     |
|---------------------------------------------------------------|-----|---|----|----|-----|
| <i>E. megalitus</i> Skuja                                     | P   | – | –  | –  | –   |
| <i>E. minima</i> France                                       | L   | c | –  | –  | o   |
| <i>E. pisciformis</i> Klebs                                   | L   | c | IN | –  | β-α |
| <i>E. proxima</i> Dang.                                       | P   | b | IN | In | o-β |
| <i>E. vagans</i> Delf.                                        | P-B | c | –  | –  | –   |
| <i>E. viridis</i> Ehr.                                        | P-B | c | –  | In | α-p |
| <i>Euglena</i> sp.                                            | –   | – | –  | –  | –   |
| <i>Phacus arnoldii</i> var. <i>ovatus</i> Popova              | –   | – | –  | –  | –   |
| <i>P. indicus</i> Skvortzov                                   | P   | c | IN | In | o-β |
| <i>P. oscillans</i> Klebs                                     | L   | c | H  | –  | –   |
| <i>P. parvulus</i> Klebs                                      | L   | c | IN | In | β   |
| <i>P. pyrum</i> (Ehr.) Sein                                   | P   | c | IN | In | o-β |
| <i>P. striatus</i> France                                     | L   | – | –  | –  | –   |
| <i>Phacus</i> sp.                                             | –   | – | –  | –  | –   |
| <i>Strombomonas acuminata</i> (Schmarda) Defl.                | L   | c | IN | In | o-β |
| <i>Trachelomonas hispida</i> (Perty) Stein emend. Defl.       | P   | c | IN | In | β   |
| <i>T. hispida</i> var. <i>crenulatocollis</i> (Maskell) Lemm. | P   | c | IN | In | –   |
| <i>T. hispida</i> var. <i>granulata</i> Playf.                | L   | c | IN | In | –   |
| <i>T. hispida</i> f. <i>punctata</i> Lemm.                    | –   | – | –  | –  | –   |
| <i>T. hispida</i> var. <i>volicensis</i> Drez.                | P-B | – | –  | –  | –   |
| <i>T. intermedia</i> Dang.                                    | P   | c | IN | In | o   |
| <i>T. planctonica</i> var. <i>oblonga</i> Drez.               | P   | c | IN | –  | –   |
| <i>T. rotunda</i> Swir.                                       | L   | c | IN | In | o   |
| <i>T. spinulosa</i> (Skv.) Defl.                              | P   | c | IN | Al | –   |
| <i>T. volvocina</i> Ehr.                                      | P   | c | IN | In | o-β |
| <i>T. volvocina</i> var. <i>punctata</i> Playf.               | P   | c | IN | –  | –   |
| <i>T. volvocina</i> var. <i>subglobosa</i> Lemm.              | P   | c | IN | In | o-β |
| <i>Trachelomonas</i> sp.                                      | –   | – | –  | –  | –   |
| <b>Chlorophyta</b>                                            |     |   |    |    |     |
| <b><u>Chlorellales</u></b>                                    |     |   |    |    |     |
| <i>Closteriopsis acicularis</i> (G.M. Sm.) Belcher et Swale   | P   | c | IN | Al | –   |
| <i>Koliella longiseta</i> (Visch.) Hind.                      | L   | c | IN | In | β   |
| <i>K. planctonica</i> Hind.                                   | P   | – | –  | –  | –   |

|                                                   |   |   |    |    |     |
|---------------------------------------------------|---|---|----|----|-----|
| <b><u>Chlorococcales</u></b>                      |   |   |    |    |     |
| <i>Chlorococcum sp.</i>                           | – | – | –  | –  | –   |
| <i>Golenkinia radiata</i> Chod.                   | P | c | IN | –  | β   |
| <b><u>Chlorodendrales</u></b>                     |   |   |    |    |     |
| <i>Tetraselmis cordiformis</i> (Carter) Stein     | P | – | –  | –  | –   |
| <b><u>Oocystales</u></b>                          |   |   |    |    |     |
| <i>Lagerheimia genevensis</i> (Chod.) Chod.       | P | c | IN | –  | β   |
| <b><u>Sphaeropleales</u></b>                      |   |   |    |    |     |
| <i>Ankistrodesmus falcatus</i> (Corda) Ralfs      | L | c | IN | –  | β   |
| <i>A. gracilis</i> (Reinsch) Korsch.              | P | c | IN | Al | β   |
| <i>Coelastrum astroideum</i> De Not.              | P | c | IN | In | β   |
| <i>C. microporum</i> Näg.                         | P | c | IN | –  | β   |
| <i>Hyaloraphidium contortum</i> Pasch. et Korsch. | L | c | IN | –  | –   |
| <i>Kirchneriella contorta</i> (Schmidle) Bohl.    | P | c | IN | –  | –   |
| <i>K. obtusa</i> (Korsch.) Kom.                   | P | c | IN | –  | –   |
| <i>Monoraphidium arcuatum</i> (Korsch.) Hind.     | P | c | IN | –  | β   |
| <i>M. contortum</i> (Thur.) Kom.–Legn.            | P | c | IN | –  | β   |
| <i>M. irregulare</i> (Smith) Kom.–Legn.           | P | c | IN | In | –   |
| <i>M. komarkovae</i> Nyg.                         | P | c | IN | In | –   |
| <i>M. minutum</i> (Näg.) Kom.–Legn.               | P | c | IN | Al | β–α |
| <i>Pediastrum biradiatum</i> Meyen                | P | c | IN | In | β   |
| <i>P. boryanum</i> (Turp.) Menegh.                | P | c | –  | In | β   |
| <i>P. boryanum</i> var. <i>longicorne</i> Reinsch | P | c | IN | In | –   |
| <i>P. duplex</i> Meyen                            | P | c | IN | –  | β   |
| <i>P. simplex</i> Meyen var. <i>simplex</i>       | P | c | IN | –  | o–β |
| <i>P. simplex</i> var. <i>echinulatum</i> Wittr.  | P | c | IN | –  | –   |
| <i>P. tetras</i> (Ehrenb.) Ralfs                  | P | c | IN | –  | β   |
| <i>Scenedesmus acuminatus</i> (Lagerh.) Chod.     | P | c | IN | –  | β   |
| <i>S. communis</i> Hegew.                         | P | c | –  | –  | –   |
| <i>S. eornis</i> (Ehr.) Chod.                     | P | c | –  | –  | β   |
| <i>S. quadricauda</i> (Turp.) Breb.               | L | c | –  | In | β   |
| <i>S. spinosus</i> Chod.                          | P | c | IN | –  | –   |
| <i>Scenedesmus sp.</i>                            | – | – | –  | –  | –   |

|                                                            |   |   |    |    |     |
|------------------------------------------------------------|---|---|----|----|-----|
| <i>Schroederia setigera</i> (Shroed.) Lemm.                | P | c | IN | –  | β   |
| <i>Tetraedron caudatum</i> (Corda) Hansg.                  | P | c | IN | –  | β   |
| <i>T. minimum</i> (Braun) Hansg.                           | P | c | IN | –  | β   |
| <b><u>Volvocales</u></b>                                   |   |   |    |    |     |
| <i>Chlamydomonas actinochloris</i> Deason et Bold          | – | – | –  | –  | –   |
| <i>C. augustae</i> Skuja                                   | – | – | –  | –  | –   |
| <i>C. kvildensis</i> Ettl                                  | P | – | H  | In | –   |
| <i>Chlamydomonas sp.</i>                                   | – | – | –  | –  | –   |
| <i>Chlorogonium gracile</i> Matw.                          | P | – | –  | –  | –   |
| <i>C. maximum</i> Skuja                                    | – | – | –  | –  | –   |
| <i>Pteromonas variabilis</i> Hub. – Pest.                  | – | – | –  | –  | –   |
| <i>Sphaerellopsis cylindrica</i> Skuja                     | P | – | IN | –  | –   |
| <b><u>Zygnematales</u></b>                                 |   |   |    |    |     |
| <i>Staurostrum tetracerum</i> Ralfs var. <i>tetracerum</i> | P | – | –  | –  | o–β |

1. Habitat: P – planktonic, L – littoral, B – benthic. 2. Distribution: c – cosmopolitan, b – boreal. 3. Salinity: IN – indifferent, H – halophilous. 4. pH: Al – alkaliphilous, In – indifferent. 5. Saprobity: o – oligosaprobous, β – β-mesosaprobous, α – α-mesosaprobous, p – polysaprobous.
